# Supplementary material for: Fabrication of single phase CsPbBr3 films via in situ metal reaction
Source: Royal Society of Chemistry journal article supplement (doi:10.1039/d1ce00103e), 2021-01-01
Supplement: d1ce00103e1.pdf [file d1ce00103e1.pdf]

## Electronic Supplementary Information

### Fabrication of Single Phase CsPbBr<sub>3</sub> Films via In-situ Metal Reaction

Lijia Guo<sup>a,b</sup>, Manying Liu<sup>\*b</sup>, Yan Lei<sup>b</sup>, Liwei Mi<sup>\*a</sup>, Zhi Zheng<sup>\*b</sup>

a. Center for Advanced Materials Research, Zhongyuan University of Technology  
Henan 450007, China. E-mail: mlwzzu@163.com

b. Key Laboratory for Micro-Nano Energy Storage and Conversion Materials of Henan  
Province, Henan Joint International Research Laboratory of Nanomaterials for Energy  
and Catalysis, Institute of Surface Micro and Nano Materials, College of Chemical and  
Materials Engineering, Xuchang University, Xuchang, Henan 461000, China. E-mail:  
manyingliu988@xcu.edu.cn, zzheng@xcu.edu.cn

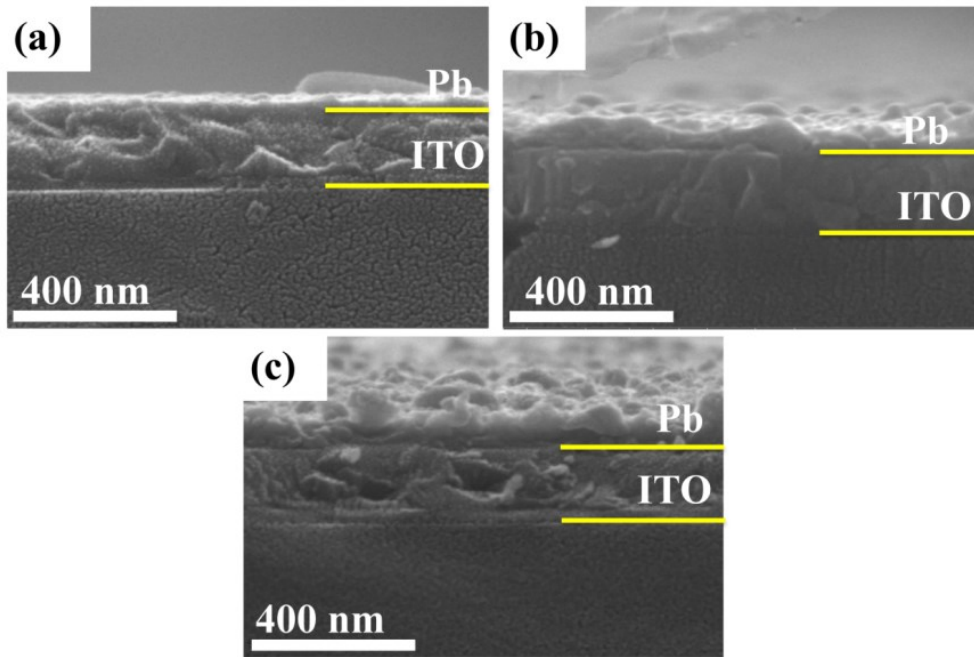

Fig. S1.(a), (b) and (c) indicate the sputtering of 20 nm Pb, 40 nm Pb and 60 nm Pb layers on ITO respectively (the true thickness is about  $\sim 21.05$  nm,  $\sim 44.48$  nm,  $\sim 64.10$  nm respectively).

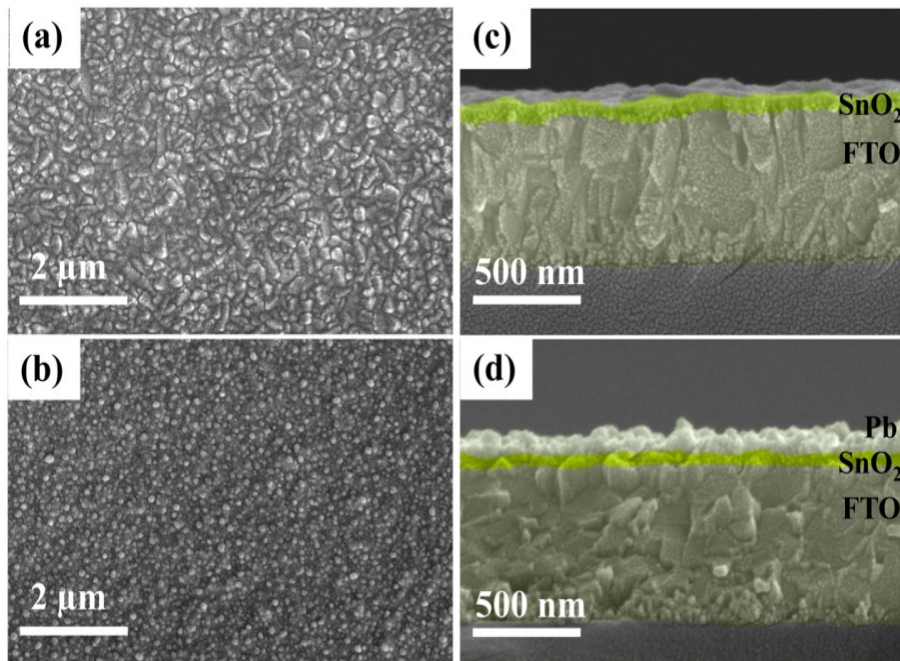

Fig.S2.,Surface SEM images (a) (b) and cross section SEM images (c) (d) of FTO / SnO<sub>2</sub> and FTO / SnO<sub>2</sub> / Pb substrate, respectively.

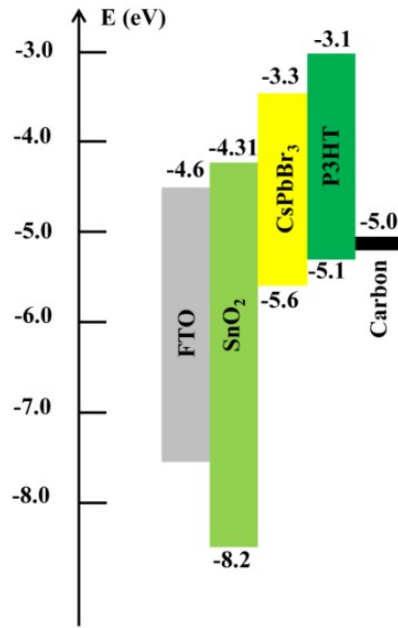

Fig. S3 The energy level diagram of FTO / SnO<sub>2</sub> /CsPbBr<sub>3</sub> / P3HT / Carbon PSCs. The results show that the energy levels of each structure match.

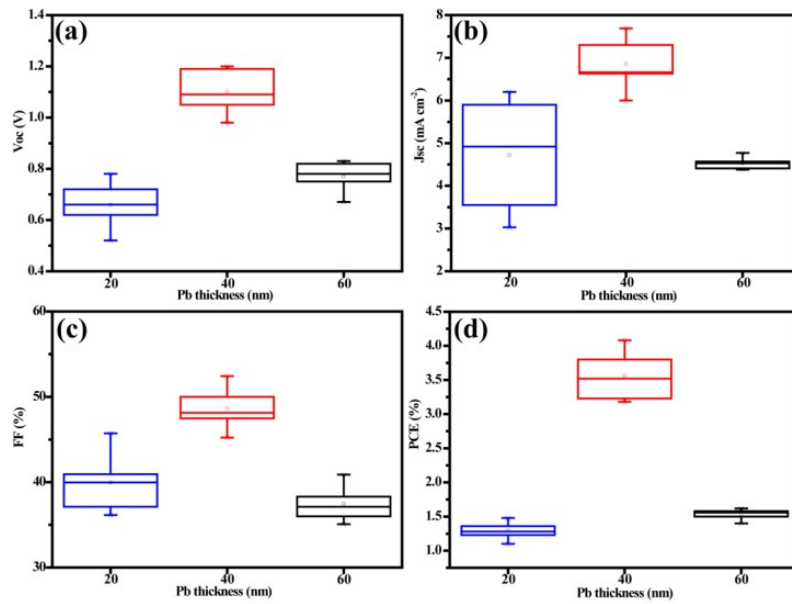

Fig. S4 The reproducibility of V<sub>oc</sub>, J<sub>sc</sub>, FF and PCE parameter values of diverse Pb thickness. The error bar represents the standard deviation from at least 15 experimental trials.
